# Supplementary material
Source: publisher figshare collection journal article supplement (https://gsajournals.figshare.com/ndownloader/files/14190671)
Supplement: Supplementary file 1 [file 14190671]

## Sheet: Sheet1
Table S4. Statistically significant results from pathway-level analysis of five kernel colorimeter traits in the Ames maize inbred panel.
Trait	SNP ID	Chr	Position of SNPa	P-value	FDR-adjusted P-valueb	MAFc	R2LRd	R2LR-SNPe	Allelic Effect Estimate	Lambda Value from Box-Cox Procedure
a*	S1_17625344	1	17930201	6.16e-05	0.0101893	0.185342	0.413929	0.41966	0.0403486	1
a*	S1_17625353	1	17930210	0.000106208	0.0163844	0.190491	0.413929	0.419291	0.0505975	1
a*	S2_44443991	2	46299837	9.89e-06	0.00380549	0.400666	0.413929	0.42091	-0.0698281	1
a*	S2_44473748	2	46329893	7.3e-07	0.000562708	0.141429	0.413929	0.422712	-0.0146303	1
a*	S2_44474139	2	46330284	4.43e-06	0.00205083	0.156269	0.413929	0.421463	0.0571909	1
a*	S5_100735811	5	103264914	0.000253262	0.0344735	0.0960024	0.413929	0.418705	0.0444478	1
a*	S6_82019628	6	85063803	1.83e-06	0.00105596	0.0399758	0.413929	0.422075	0.00103127	1
a*	S6_82020301	6	85064476	0.000336216	0.0432224	0.0545124	0.413929	0.418515	0.0409536	1
a*	S6_82020346	6	85064521	2.65e-07	0.00030708	0.061175	0.413929	0.423416	0.00221631	1
a*	S7_14078791	7	14495640	3.25e-10	7.53e-07	0.0496669	0.413929	0.428139	0.056491	1
a*	S7_14079925	7	14496774	2.08e-05	0.00401575	0.105391	0.413929	0.4204	0.0279328	1
a*	S8_138882509	8	143020478	1.87e-05	0.00393014	0.397335	0.413929	0.420474	-0.0177572	1
a*	S8_138882747	8	143020716	1.32e-05	0.00380549	0.347365	0.413929	0.420714	-0.0129206	1
a*	S8_138882751	8	143020720	1.83e-05	0.00393014	0.341611	0.413929	0.420489	-0.0221375	1
a*	S8_138882897	8	143020866	0.00035724	0.043508	0.442459	0.413929	0.418474	0.0241456	1
a*	S8_138888257	8	143026226	0.000158101	0.0228654	0.139612	0.413929	0.419022	0.00811861	1
a*	S8_138888278	8	143026247	1.22e-05	0.00380549	0.416111	0.413929	0.420768	0.029326	1
a*	S8_138888328	8	143026297	1.57e-05	0.00393014	0.428831	0.413929	0.420594	-0.00701973	1
a*	S8_138902602	8	143040064	5.96e-05	0.0101893	0.259237	0.413929	0.419683	0.0311139	1
b*	S6_82018091	6	85062266	2.85e-05	0.0329692	0.0617807	0.287832	0.295435	1.33671	1
b*	S8_138886754	8	143024723	6.91e-06	0.0159823	0.365536	0.287832	0.296615	0.871437	1
Chroma	S6_82018091	6	85062266	1.38e-05	0.0296446	0.0617807	0.253463	0.262064	0.789512	1
Chroma	S8_138886754	8	143024723	2.56e-05	0.0296446	0.365536	0.253463	0.261525	0.54468	1
Chroma	S9_20472920	9	20252034	6.15e-05	0.0474614	0.178982	0.253463	0.260765	-1.08641	1
hue	S2_44443991	2	46299837	0.000146836	0.0283148	0.400666	0.493162	0.49761	21.6529	2
hue	S2_44473748	2	46329893	0.000233858	0.0386534	0.141429	0.493162	0.497339	6.35555	2
hue	S3_170106723	3	172731046	0.000346995	0.0472322	0.179588	0.493162	0.49711	-5.08434	2
hue	S3_170108994	3	172733317	9.45e-05	0.0198758	0.182314	0.493162	0.497868	-16.1676	2
hue	S6_82020346	6	85064521	0.000311981	0.0455755	0.061175	0.493162	0.497171	-4.20701	2
hue	S7_14078791	7	14495640	4.74e-08	0.000109678	0.0496669	0.493162	0.502408	-10.3513	2
hue	S8_138882509	8	143020478	8.6e-06	0.00248856	0.397335	0.493162	0.499282	-9.64945	2
hue	S8_138882747	8	143020716	7.77e-06	0.00248856	0.347365	0.493162	0.499343	11.2646	2
hue	S8_138882751	8	143020720	6.9e-06	0.00248856	0.341611	0.493162	0.499413	0.996919	2
hue	S8_138882897	8	143020866	7.24e-05	0.0167478	0.442459	0.493162	0.498024	-7.96069	2
hue	S8_138883056	8	143021025	0.00019053	0.0339143	0.453059	0.493162	0.497458	-5.32772	2
hue	S8_138886754	8	143024723	6.89e-05	0.0167478	0.365536	0.493162	0.498053	-1.52717	2
hue	S8_138888257	8	143026226	1.35e-06	0.000781798	0.139612	0.493162	0.500387	6.25255	2
hue	S8_138888278	8	143026247	2.52e-07	0.000291462	0.416111	0.493162	0.501398	-3.16551	2
hue	S8_138888328	8	143026297	3.97e-07	0.000306561	0.428831	0.493162	0.501123	-2.81161	2
hue	S8_138888539	8	143026508	0.000315129	0.0455755	0.165354	0.493162	0.497166	-27.9554	2
hue	S8_138902602	8	143040064	2.39e-06	0.00110499	0.259237	0.493162	0.500047	-5.12704	2
L*	S1_250915992	1	255044348	1.59e-05	0.0368175	0.161417	0.336099	0.343638	13.1058	2
a Position of SNP: Genomic position (bp) of the SNP from B73 RefGen_v4
b FDR-adjusted P-value: False discovery rate adjusted P-value
c MAF: Minor-allele frequency
d R2LR: R2 likelihood ratio value of model without SNP
e R2LR-SNP: R2 likelihood ratio value of model with SNP
